1     **The small noncoding RNA sr8384 determines solvent synthesis and**  
2                     **cell growth in industrial solventogenic clostridia**

3             Running title: Functional sncRNA in solventogenic clostridia

4             Yunpeng Yang<sup>1</sup>, Nannan Lang<sup>1</sup>, Huan Zhang<sup>1</sup>, Lu Zhang<sup>1</sup>, Changsheng Chai<sup>1</sup>,  
5                                     Weihong Jiang<sup>1, 2\*</sup>, Yang Gu<sup>1, 3\*</sup>

6

7

8     <sup>1</sup>Key Laboratory of Synthetic Biology, CAS Center for Excellence in Molecular Plant  
9     Sciences, Shanghai Institute of Plant Physiology and Ecology, Chinese Academy of  
10    Sciences, Shanghai 200032, China, <sup>2</sup>Jiangsu National Synergetic Innovation Center  
11    for Advanced Materials, SICAM, 200 North Zhongshan Road, Nanjing 210009, China  
12    and <sup>3</sup>Shanghai Collaborative Innovation Center for Biomanufacturing Technology,  
13    130 Meilong Road, Shanghai 200237, China.

14

15    To whom correspondence should be addressed. Weihong Jiang, 300 Fenglin Road,  
16    Shanghai, China. Tel: 86-21-54924172; Fax: 86-21-54924015. E-mail:  
17    whjiang@sibs.ac.cn. Correspondence may also be addressed to Yang Gu, 300 Fenglin  
18    Road, Shanghai, China. Tel: 86-21-54924178; Fax: 86-21-54924015. E-mail:  
19    ygu02@sibs.ac.cn

20 **ABSTRACT**

21 Small noncoding RNAs (sncRNAs) are crucial regulatory molecules in organisms and  
22 are well known not only for their roles in the control of diverse essential biological  
23 processes but also for their value in genetic modification. However, to date, in  
24 gram-positive anaerobic solventogenic clostridia (which are a group of important  
25 industrial bacteria with exceptional substrate and product diversity), sncRNAs remain  
26 minimally explored, leading to a lack of detailed understanding regarding these  
27 important molecules and their use as targets for genetic improvement. Here, we  
28 performed large-scale phenotypic screens of a transposon-mediated mutant library of  
29 *Clostridium acetobutylicum*, a typical solventogenic clostridial species, and  
30 discovered a novel sncRNA (sr8384) that functions as a determinant positive regulator  
31 of growth and solvent synthesis. Comparative transcriptomic data combined with  
32 genetic and biochemical analyses revealed that sr8384 acts as a pleiotropic regulator  
33 and controls multiple targets that are associated with crucial biological processes,  
34 through direct or indirect interactions. Notably, modulation of the expression level of  
35 either sr8384 or its core target genes significantly increased the growth rate, solvent  
36 titer and productivity of the cells, indicating the importance of sr8384-mediated  
37 regulatory network in *C. acetobutylicum*. Furthermore, a homolog of sr8384 was  
38 discovered and proven to be functional in another important *Clostridium* species, *C.*  
39 *beijerinckii*, suggesting the potential broad role of this sncRNA in clostridia. Our  
40 work showcases a previously unknown potent and complex role of sncRNAs in  
41 clostridia, providing new opportunities for understanding and engineering these

42 anaerobes, including pathogenic *Clostridium* species.

43 **IMPORTANCE**

44 The discovery of sncRNAs as new resources for functional studies and strain  
45 modifications are promising strategies in microorganisms. However, these crucial  
46 regulatory molecules have hardly been explored in industrially important  
47 solventogenic clostridia. Here, we identified sr8384 as a novel determinant sncRNA  
48 controlling cellular performance of solventogenic *Clostridium acetobutylicum* and  
49 performed detailed functional analysis, which is the most in-depth study of sncRNAs  
50 in clostridia to date. We reveal the pleiotropic function of sr8384 and its multiple  
51 direct and indirect crucial targets, which represents a valuable source for  
52 understanding and optimizing this anaerobe. Of note, manipulation of these targets  
53 leads to improved cell growth and solvent synthesis. Our findings provide a new  
54 perspective for future studies on regulatory sncRNAs in clostridia.

## 55 INTRODUCTION

56 Historically, the application of solventogenic clostridia in the large-scale production  
57 of the bulk chemicals acetone, n-butanol and ethanol, a process called ABE  
58 fermentation, has demonstrated the value of these anaerobic microorganisms (1, 2). In  
59 recent years, in view of the exceptional substrate and product diversity of  
60 solventogenic clostridia, the biological production of cost-effective bulk chemicals  
61 and biofuels using *Clostridium* species as chassis has attracted renewed attention (3).  
62 To unlock the full potential of solventogenic clostridia in industrial applications, a  
63 detailed understanding of metabolic regulation and discovery of more crucial  
64 regulatory elements in these anaerobes are necessary. However, to date, this aspect  
65 remains minimally explored, and only a limited number of transcription factors from  
66 solventogenic clostridia have been identified and subjected to functional analysis (4);  
67 in addition, other types of regulatory molecules and modes (e.g., post-transcriptional  
68 and post-translational modes) remain largely unexplored. The lack of knowledge  
69 regarding these aspects will inevitably increase the difficulty in identifying new  
70 targets for strain improvement.

71 Small noncoding RNAs (sncRNAs) are crucial regulatory molecules in organisms  
72 (5, 6). In addition, sncRNAs have been increasingly regarded as promising targets for  
73 genetic improvement (7-9). Despite the increasing interest in the function of small  
74 RNAs in solventogenic clostridia, they remain largely unexplored in these anaerobes.  
75 To date, only a few small RNAs have been identified in solventogenic clostridia (10,  
76 11) . A newly reported regulator of SolB in *Clostridium acetobutylicum* was found to

77 specifically regulate the expression of the genes in the *sol* locus, leading to a  
78 solvent-deficient phenotype after overexpression (12). Notably, a comprehensive list  
79 of sRNAs in 21 clostridial genomes (including two industrial *Clostridium* strains: *C.*  
80 *acetobutylicum* and *Clostridium beijerinckii*) has been computationally predicted,  
81 revealing a large number of sncRNAs in the genus *Clostridium* (13). This work,  
82 despite not focusing on functional analysis, strongly supports a continued  
83 investigation of the important roles of sncRNAs in industrial clostridia.

84 Here, we report the discovery of a novel sncRNA (sr8384) in *C. acetobutylicum*, a  
85 representative species of industrial solventogenic clostridia, based on phenotypic  
86 screening of a previously established transposon-based random mutant library (14).  
87 The sncRNA sr8384 was not identified in the previous systematic screening of the  
88 intergenic regions of *C. acetobutylicum* via computational analysis (13), indicating  
89 that this sncRNA has unique features that are distinct from those of the reported  
90 bacterial small RNAs. A series of genetic and biochemical analyses were carried out  
91 for a detailed functional analysis of sr8384, revealing a regulatory network that  
92 controls crucial phenotypes of *C. acetobutylicum*. Manipulation of sr8384 or its gene  
93 targets could effectively promote growth and solvent production, demonstrating the  
94 importance of this sncRNA as well as the related gene network in genetic  
95 improvement. Furthermore, we also identified a functional sr8384 homolog in *C.*  
96 *beijerinckii*, another important *Clostridium* species that is widely used in the  
97 fermentation of lignocellulose hydrolysates, indicating the important functions and  
98 broad role of sr8384-like sncRNAs in solventogenic clostridia

## 99 **RESULTS**

### 100 **Phenotypic screens reveal a transposon mutant with greatly changed solvents**

#### 101 **production**

102 In a previous study, we established a *mariner*-based transposon system in *C.*  
103 *acetobutylicum* ATCC 824, which generated a mutant library (more than 30,000  
104 mutants) with high randomness (14). As a continuation of this work, we recently used  
105 this library to screen for mutants with phenotypic changes in essential traits, such as  
106 growth and solvent synthesis. According to the process shown in Figure 1A, more  
107 than 600 mutants were tested, and we obtained a transposon mutant (Tn mutant) that  
108 exhibited greatly impaired solvent formation during fermentation using glucose as the  
109 carbon source. This mutant could produce only 6.9 g/L of total solvents (acetone,  
110 butanol and ethanol) after 96 h of fermentation (Figure 1B), which is far less than the  
111 level produced by the wild-type strain, indicating the presence of a transposon  
112 insertion at an essential chromosomal position in the Tn mutant. By sequencing the  
113 reverse PCR product of the Tn mutant, we found that this mutant contained a  
114 transposon insertion in a 198-nt gene of unknown function (CAC2384) (Figure 1C).

115

#### 116 **Characterization of the Tn mutant reveals a novel small noncoding RNA: sr8384**

117 To verify whether the abovementioned phenotypic changes of the Tn mutant were  
118 due to CAC2384 inactivation, we used the group II intron-based gene inactivation  
119 method (15) to disrupt CAC2384 in wild-type *C. acetobutylicum* (Figure 1D), and the  
120 mutant obtained (named Cac-2384m) was used for phenotypic investigation.

121 Additionally, southern blot analysis was performed to verify that the intron was  
122 incorporated only once into the genome of Cac-2384m with no other non-specific  
123 insertions (Figure S1). As expected, the Cac-2384m strain exhibited very similar  
124 profile of growth and solvent production (acetone, butanol and ethanol) to the Tn  
125 mutant strain (Figure 1E).

126 However, when genetic complementation was performed by separately introducing  
127 four plasmids (the plasmid pP<sub>2384</sub>-2384, which expressed CAC2384 under the control  
128 of the native promoter P<sub>2384</sub> of CAC2384; the plasmid pP<sub>2384</sub>, which harbored only the  
129 promoter P<sub>2384</sub>; the plasmid pP<sub>thi</sub>-2384, which expressed CAC2384 under the control  
130 of the constitutive promoter P<sub>thi</sub>; and the plasmid pP<sub>thi</sub>, which harbored only the  
131 promoter P<sub>thi</sub>) back into the Cac-2384m strain (Figure 2A), a surprising but interesting  
132 result was obtained: both the pP<sub>2384</sub>-2384 and pP<sub>2384</sub> plasmids could complement the  
133 deficiency of the Cac-2384m mutant in solvent formation, whereas both the  
134 pP<sub>thi</sub>-2384 and pP<sub>thi</sub> plasmids failed to do so (Figure 2B). To further convincing this  
135 finding, we performed genetic complementation experiment again through  
136 chromosomal insertion of the target DNA sequence by using the “Clostron”  
137 technology (16, 17). In brief, the abovementioned four DNA fragments were  
138 separately integrated into an intron sequence, and then inserted into the chromosome  
139 to see if the impaired phenotypes of the Cac-2384m mutant could be restored (Figure  
140 S2A, B and C). As expected, the results (Figure S2D) were similar with the  
141 abovementioned genetic complementation experiment using multicopy plasmids  
142 (Figure 2). Obviously, all these data strongly suggest that the phenotypic changes in



143 the Cac-2384m mutant can be recovered by the independent expression of the  
144 upstream noncoding sequence ( $P_{2384}$ ) of CAC2384. In other words, there may be some  
145 crucial DNA elements in the upstream region of CAC2384, although it is unclear why  
146 the insertional disruption of CAC2384 influenced this non-coding region.

147 Next, a detailed functional analysis of the  $P_{2384}$  sequence was performed to explore  
148 the above hypothesis. The whole sequence (202 nt) of  $P_{2384}$  was gradually truncated,  
149 yielding 10 truncated fragments, i.e.,  $P_{2384}$  minus 10, 20, 30, 40, 50, 60, 100, 120, 140  
150 or 150 nt. These DNA fragments were integrated into the expression plasmid and then  
151 introduced into the Cac-2384m mutant for genetic complementation analysis (Figure  
152 S3A). The results showed that all the truncated fragments retained complementation  
153 functions except the shortest fragment (with a 150-bp deletion) (Figure S3B), thus  
154 suggesting that the potential DNA element suggested above is located within the 62-nt  
155  $P_{2384-140}$  sequence. Given the very low chance that this short 62-nt sequence encodes a  
156 functional protein, we reasoned that it may encode a small RNA (sRNA).

157 To explore this possibility, the following experiments were performed in sequence:  
158 (i) a two-step RT-PCR analysis for determining the transcriptional direction of the  
159  $P_{2384-140}$  sequence; RACE (5' and 3' rapid amplification of cDNA ends) experiment  
160 aiming to determine the actual transcript length of  $P_{2384-140}$ ; (ii) Northern blotting to  
161 verify the role of this transcript (a small RNA or not). As shown in Figure S4A, in the  
162 two-step RT-PCR analysis, theoretically, only the PCR amplification using P-2 as the  
163 initial primer will give the desired PCR product (Case II). As expected, a 62-nt PCR  
164 band was detected from the total RNA of the wild-type *C. acetobutylicum* when using

165 the primer P-2 to initiate the PCR reaction (Figure S4B), indicating that the native  
166 transcriptional direction of the P<sub>2384-140</sub> sequence. On this basis, the RACE experiment  
167 was carried out. The result further revealed a 94-nt transcript, which is located  
168 between the CAC2383 and CAC2384 genes and partially overlaps with the ORF of  
169 CAC2383 (Figure 3A). Given that this 94-nt short transcript has a stable and typical  
170 secondary structure (Figure 3B), no Shine-Dalgarno (SD) sequence, and start and stop  
171 codons, it was very likely as sncRNA. On this basis, Northern blotting using a  
172 single-stranded oligonucleotide probe targeting this 94-nt transcript was performed to  
173 further confirm the existence of this sncRNA. The whole DNA fragment covering the  
174 ORF of CAC2383 and CAC2384 as well as their intergenic region was  
175 PCR-amplified and then integrated it into a replicative plasmid for expression (Figure  
176 3C), aiming to enrich the *in vivo* level of the potential sRNA. Encouragingly, after the  
177 resulting plasmid (psRNA) and a control plasmid (pControl) were transferred into *C.*  
178 *acetobutylicum* for Northern blot analysis, a desired approximate 94-nt hybridization  
179 signal was detected from the strain containing the plasmid psRNA, while no signal  
180 found from the control (Figure 3C).

181 In summary, the above results suggest the presence of a 94-nt sncRNA-coding  
182 sequence in the intergenic region between CAC2383 and CAC2384. Notably, this  
183 sncRNA, named sr8384 here, is not present in the list of sRNAs that were previously  
184 identified in *Clostridium* organisms *via* computational analysis (13), indicating that  
185 sr8384 has some novel genetic features.

186

187 **sr8384 is crucial for the control of cell growth and solvents synthesis in *C.***

188 ***acetobutylicum***

189 Having discovered the sr8384, it remained unknown whether this sncRNA is a  
190 crucial molecule in *C. acetobutylicum*. Therefore, the sr8384 transcript was disrupted  
191 for phenotypic examination using small regulatory RNA-based gene knockdown  
192 technology (18, 19). As shown in Figure 4A, a vector containing a 24-nt  
193 target-binding (TB) sequence that targets the middle region of sr8384 was constructed  
194 and introduced into the wild-type *C. acetobutylicum* strain, yielding the mutant strain  
195 824(8384r). The mutant strain 824(8384r) exhibited a greater than 50% decrease in  
196 sr8384 transcript levels compared to the levels in the 824c strain (Figure 4C),  
197 demonstrating effective *in vivo* knockdown of the sr8384 transcript. Subsequently, in  
198 a batch fermentation, compared to the control strain 824c (containing the same  
199 plasmid lacking the 24-nt target-binding sequence), the 824(8384r) strain exhibited  
200 greatly impaired growth and synthesis of all the three major solvents (acetone, butanol  
201 and ethanol) (Figure 4B), in which the impact on butanol is especially significant  
202 (10.59 g/L vs. 14.54 g/L). These data suggest that sr8384 plays a crucial role in *C.*  
203 *acetobutylicum*.

204 Since sr8384 plays an essential role in *C. acetobutylicum*, a derived question is  
205 whether enhancement of the *in vivo* levels of this sncRNA could promote the cellular  
206 performance of *C. acetobutylicum*. Therefore, we constructed an expression vector in  
207 which the coding sequence of sr8384 was overexpressed under the control of a strong  
208 constitutive promoter, namely,  $P_{thi}$ . The plasmid was then introduced into the

209 wild-type *C. acetobutylicum*, yielding the strain CAC-smR. Encouragingly, the strain  
210 CAC-smR exhibited a greatly enhanced growth rate, biomass and production of the  
211 total solvents (acetone, butanol and ethanol) compared to the control strain (Figure  
212 4D). Overall, these findings showcase not only the indispensability of sr8384 but also  
213 the potential value of this sncRNA as a molecular tool in *C. acetobutylicum*.

214

### 215 **Global regulatory role of sr8384 in *C. acetobutylicum***

216 Because sr8384 overexpression led to the positive phenotypic changes of *C.*  
217 *acetobutylicum* (Figure 4D), we used a comparative transcriptomics approach to  
218 search for genes affected by sr8384. The RNA samples for microarray assays were  
219 isolated from the sr8384-overexpressing strain CAC-smR and the control strain at two  
220 time points, namely, 23 h and 42 h, reflecting acidogenic and solventogenic stages,  
221 respectively (Figure 4D). The results showed that 679 and 380 genes exhibited  
222 significantly altered transcriptional levels (fold change  $\geq 2.0$ ) at 23 h and 42 h (Table  
223 S1 and S2), respectively, of which 172 genes were detected at both time points  
224 (Figure S5A). These differentially expressed genes could be roughly grouped into 16  
225 subsets (Figure S5B), including some subsets of genes associated with important  
226 physiological and metabolic processes. These results indicate a crucial and global  
227 regulatory role of sr8384 in *C. acetobutylicum*. We selected 10 genes that exhibited  
228 different degrees of transcriptional repression or activation in the microarray assay  
229 after sr8384 overexpression for expression level validation using qRT-PCR. The  
230 qRT-PCR results were consistent with the data from the microarray analysis (Figure

231 S6), indicating that the microarray data was of high quality.

232 Of note, five genes known to significantly influence the production of solvents in *C.*  
233 *acetobutylicum*, including a AbrB-coding gene, two histidine kinase-coding genes and  
234 two essential genes in the *sol* operon (4) were found to be significantly upregulated  
235 after sr8384 overexpression according to the microarray data (Figure S7A), although  
236 the results of RNA hybridization analysis showed no binding activity between sr8384  
237 and the transcripts of these five genes (Figure S7B). Therefore, it can be concluded  
238 that sr8384 indirectly activates the expression of these crucial genes, which may  
239 contribute to the solvent production in *C. acetobutylicum*.

240 Our next challenge was to identify direct targets controlled by sr8384. To this end,  
241 we first used the online tool IntaRNA (20) to predict putative target sequences based  
242 on their potential interaction energy with sr8384. The top 100 sequences (with  
243 interaction energies  $\leq -18.3083$  kcal/mol) within the predicted results were chosen for  
244 further investigation. The genes associated with these 100 sequences (located in the  
245 promoter or coding region) that exhibited  $\geq 2$ -fold transcriptional changes (microarray  
246 assay) after sr8384 overexpression were selected, resulting in 26 candidates as well as  
247 their associated genes being used for further detailed investigations (Figure 5A). As  
248 shown in Table S3, most of these 26 target sequences spanned both the promoter and  
249 coding regions of their corresponding genes. Next, these 26 candidates were used for  
250 RNA hybridization analysis to examine whether these genes interact with sr8384. The  
251 results showed that, of the 26 candidates, 15 exhibited distinct binding activity with  
252 sr8384 (Figure 5B), whereas no obvious binding was observed for the remaining

253 candidates. Among these 15 sequences of direct targets of sr8384, nine were  
254 associated with genes with annotated functions (Table S3).

255 To explore whether the genes associated with these 15 sr8384 target sequences  
256 contributed to the phenotypic changes of the CAC-smR strain, we conducted  
257 knockdown or overexpression of these genes (11 knockdown strains and 4  
258 overexpressing strains) (Figure 6), according to the transcriptional alterations of these  
259 genes after sr8384 overexpression (Figure 5A), yielding a total of 15 mutant strains.

260 Here, the knockdown of the 11 genes was performed by using the same method  
261 mentioned above (18, 19), in which a 24-nt sequence targeting each gene was  
262 expressed (Figure 6A). By this method, the transcriptional levels of the 11 genes were  
263 decreased to different extents (Figure 6B), and the resulting mutants were used for  
264 phenotypic examination. Only 6 of the 11 genes, namely, CAC1218, CAC2157,  
265 CAC2221, CAC1485, CAC1571 and CAC1133, caused increased or decreased  
266 synthesis of the solvents after their knockdown (Figure 6C and S8A). Notably,  
267 knockdown of CAC1571 significantly impaired solvent production (Figure 6C).  
268 CAC1571 is annotated to encode glutathione peroxidase, an enzyme known to protect  
269 organisms from oxidative damage (21). Thus, repression of the expression of this gene  
270 may damage the basic tolerance of *C. acetobutylicum* to oxygen stress during  
271 anaerobic fermentation.

272 Upon overexpression of the other four genes, namely, CAC2470, CAC3157,  
273 CAC3318 and CAC0365, increased or accelerated solvents formation was observed  
274 for the first three strains (pCAC2470, pCAC3157 and pCAC3318), while a clear lag

275 in solvent synthesis was observed for the final strain (pCAC0365) (Figure 6D and  
276 S8B). The CAC0365 gene is predicted to encode a phosphoglycerate dehydrogenase,  
277 an enzyme that catalyzes the synthesis of serine from 3-phosphoglycerate (22). Thus,  
278 as shown in Figure S9, overexpression of CAC0365 could decrease the metabolic flux  
279 from 3-phosphoglycerate to pyruvate, the precursor for solvent synthesis, thereby  
280 impairing solvent production in *C. acetobutylicum*.

281 Because separate overexpression of CAC2470, CAC3157 or CAC3318 all led to  
282 increased solvent production in *C. acetobutylicum*, we asked whether the combined  
283 overexpression of these functional genes would have a synergistic effect. To this end,  
284 we coexpressed these three genes under the control of the constitutive promoter  $P_{thl}$ .  
285 As shown in Figure 6E and S8C, the engineered strain pCAC3157-3318-2470 further  
286 exhibited slightly increased growth and solvent production compared to the strain  
287 pCAC3157 (the one with highest solvent titer among the three separate  
288 overexpressing strains as shown in Figure 6D). This finding confirms the above  
289 hypothesis and, moreover, indicates that a combined modulation of the sr8384 targets  
290 may further improve the cellular performance of *C. acetobutylicum*..

291

292 **CAC2385: an indirect sr8384 target with a significant effect on cell growth and**  
293 **solvent production**

294 According to the microarray data, we observed that the CAC2385 gene, which is  
295 located downstream of the sr8384 sequence (453 nt apart) in the chromosome, showed  
296 a nearly 3-fold upregulation (at 23 h) after sr8384 overexpression (Table S1),

297 suggesting a potential regulatory effect of sr8384 on CAC2385. However, RNA  
298 hybridization analysis showed no direct interaction between sr8384 and the transcript  
299 of CAC2385 or its upstream noncoding region (Figure 7A). Therefore, the altered  
300 CAC2385 expression after sr8384 overexpression (Table S1) was likely due to an  
301 indirect effect.

302 However, the function of the CAC2385 gene is not known. When SMART (23)  
303 (Simple Modular Architecture Research Tool, <http://smart.embl-heidelberg.de>) was  
304 used to analyze the protein encoded by CAC2385, a DNA-binding HTH domain was  
305 predicted, indicating that this protein is likely a transcription factor (TF). To explore  
306 the role of CAC2385 in *C. acetobutylicum*, this gene was overexpressed for  
307 phenotypic investigation. Encouragingly, the resulting strain (CACp2385) exhibited  
308 significantly improved cellular performance compared to the performance of the  
309 control strain (CACp), i.e., a much higher growth rate and increased productivity of  
310 the three major products (Figure 7B). This finding suggests that the CAC2385 gene  
311 constitutes an important element in the sr8384 regulatory network.

312 Based on the significantly enhanced solvent production after CAC2385  
313 overexpression, we specifically examined the transcriptional changes associated with  
314 all the essential genes in solvent synthetic pathways (Figure 7C) using qRT-PCR. The  
315 results showed that the *adhE1* gene (CAP0162); two major alcohol  
316 dehydrogenase-coding genes, namely, *adhE2* (CAP0035) and *adh* (CAP0059); and the  
317 acetone synthetic pathway gene *adc* (CAP0165) were all greatly upregulated (4.78,  
318 3.03, 3.08 and 8.08-fold increase, respectively) (Figure 7D). Actually, the expression



319 level of *adhE1* can represent that of the *sol* operon, which is a cotranscribed gene  
320 cluster (CAP0162-0163-0164). The greatly enhanced expression of these essential  
321 genes responsible for solventogenesis may partly explain the significantly increased  
322 ability of the strain CACp2385 in the production of acetone, ethanol and butanol.  
323 However, no binding activity was detected between the CAC2385 protein and  
324 intergenic regions upstream of the abovementioned genes (CAP0162, CAP0035,  
325 CAP0059 and CAP0165) according to the EMSA results (Figure 7E), indicating that  
326 the influence of CAC2385 to these targets is also indirect.

327

### 328 **Manipulation of sr8384 and its homolog leads to improved growth and solvent** 329 **synthesis in Clostridium**

330 To further explore the role of sr8384 in genetic improvement based on the above  
331 result (Figure 4D), we used three promoters ( $P_{200-1}$ ,  $P_{thl}$  and  $P_{1200-9-15}$ ) (24) with  
332 gradually increasing activities for sr8384 overexpression (Figure 8A) to determine  
333 whether this sncRNA has a dosage-dependent effect on cellular performance. As  
334 expected, the resulting three strains exhibited improved growth rate and solvent titer  
335 and productivity to different extents compared to the control strain (Figure 8B);  
336 however, surprisingly, the best effect was seen with the weakest promoter, namely,  
337  $P_{200-1}$ , rather than the other two stronger promoters (Figure 8B), reflecting that the *in*  
338 *vivo* sr8384 level is associated with the cellular performance of *C. acetobutylicum*.

339 To date, numerous sRNAs have been found to be conserved in several genera (25).

340 Thus, we sought to find sr8384 homologs in other clostridial genome sequences

341 available in NCBI. BlastN analysis showed that no putative sr8384 homologs were  
342 present in any other *Clostridium* species except two *C. acetobutylicum* strains  
343 (EA2018 and DSM1731) (Figure 8C). Interestingly, when we scanned the genome of  
344 *C. beijerinckii* NCIMB 8052, another major solventogenic *Clostridium* species, a  
345 potential homologous sequence that shares high identity (54.1%) with the sr8384  
346 sequence was found in the intergenic region between the Cbei1789 and Cbei1788  
347 genes (which are two conserved orthologs in *C. beijerinckii*, corresponding to  
348 CAC2383 and CAC2385 in *C. acetobutylicum*, respectively) (Figure 8C). Here, this  
349 sequence was named sr8889. Next, we investigated whether sr8889 was also  
350 functional in *C. beijerinckii*. As expected, overexpression of this sequence indeed  
351 resulted in an increased growth rate and a greater than 20% increased titer of the total  
352 solvents (acetone, butanol and ethanol) compared with the values for these parameters  
353 in the wild-type strain (Figure 8D). Taken together, these results show that sr8889  
354 plays an important role in *C. beijerinckii*. Moreover, although not highly conserved in  
355 different *Clostridium* species, this type of pleiotropic sncRNA appears to be crucial  
356 for industrial clostridia, which has not been fully recognized and remains to be  
357 explored.

358

359

360

361

362

## 363 **DISCUSSION**

364 Discovery and functional analysis of sncRNAs have been performed in some  
365 representative industrial microorganisms, such as *E. coli* (26), *Saccharomyces*  
366 *cerevisiae* (27, 28) and *B. subtilis* (5, 29). However, sncRNAs as well as their  
367 potential values in metabolic engineering remain largely unexplored in solventogenic  
368 *Clostridium* species. In this study, we discovered the atypical sncRNA sr8384 and its  
369 utility in the control of growth and solvent synthesis in *C. acetobutylicum*, a model  
370 organism for clostridia. To the best of our knowledge, such a determinant sncRNA  
371 with a crucial regulatory role in clostridia has not been previously reported.

372 To date, only an extremely limited number of sncRNAs have been shown to be  
373 associated with certain functions in clostridia (10-12). The sncRNA sr8384 identified  
374 here is a global rather than specific regulatory molecule in *C. acetobutylicum*. Given  
375 that sr8384 was not predicted or detected in the previous screenings for sRNAs in  
376 clostridia based on comparative genomics and RNA-seq (13, 30, 31), this sncRNA is  
377 likely atypical in sequence or is very poorly expressed in *C. acetobutylicum*.  
378 Moreover, sr8384 exhibited a dose-dependent effect in the regulation of phenotypes of  
379 *C. acetobutylicum*, i.e., negative and positive phenotypic changes were observed upon  
380 repression and overexpression, respectively, of this sncRNA (Figure 4B and D), thus  
381 indicating that sr8384 has potential application as a target for strain improvement.

382 The greatly enhanced growth rate and solvent productivity upon sr8384  
383 overexpression are two important phenotypic alterations in *C. acetobutylicum*. This  
384 effect could be attributed to the direct or indirect regulation by sr8384 of multiple

385 effective targets (Figure 6C and D). Among the 10 sr8384 targets involved in the  
386 effect on solvent production (Figure 6C and D), CAC1571 exhibited the most  
387 negative changes when repressed (Figure 6C). As mentioned above, CAC1571  
388 encodes a putative glutathione peroxidase. This enzyme is essential in organisms and  
389 is capable of protecting cells from oxidative damage (21, 32). In *C. acetobutylicum*, in  
390 addition to CAC1571, two other genes (CAC1570 and CAC1549) were also predicted  
391 to encode glutathione peroxidase (33). All three of these genes have been found to be  
392 rapidly upregulated in response to O<sub>2</sub> flushing (21), indicating the importance of these  
393 genes in the scavenging of reactive oxygen species (ROS) in the anaerobic *C.*  
394 *acetobutylicum*. Therefore, the phenotypic changes caused by the repression of  
395 CAC1571 further reinforce the above hypothesis.

396 Notably, among the 11 sr8384 targets that were chosen for phenotypic investigation  
397 using small regulatory RNA interference (Figure 6A), some were not greatly knocked  
398 down at the transcript level (Figure 6B). For example, the transcriptional levels of  
399 CAC0602, CAC1163 and CAC2617 were downregulated by only less than 30%. The  
400 insufficient repression of these genes may not truly reveal their effects on cellular  
401 phenotypes, and detailed investigations remain to be performed.

402 As mentioned above, the *sol* operon is crucial for acid (acetic and butyric acids)  
403 assimilation and ABE solvent formation in *C. acetobutylicum*. Significant  
404 upregulation (6.57-fold) of the *sol* genes was also observed after sr8384  
405 overexpression (Table S1). Therefore, upregulation of the *sol* genes definitely  
406 contributes to the enhancement in solvent production derived from sr8384

407 overexpression.

408 In addition, we observed that the transcriptional levels of CAC3319 and CAC0323,  
409 two orphan histidine kinase-coding genes, increased 2.16- and 2.24-fold, respectively,  
410 after sr8384 overexpression (Table S1). These two genes are known to be responsible  
411 for the phosphorylation of Spo0A. This protein is a well-known global regulator  
412 involved in the control of multiple physiological and metabolic processes and is  
413 simultaneously capable of improving solvent production by activating several key  
414 genes (the *sol* operon, *adc*, *bdhA* and *bdhB*) in *C. acetobutylicum* (34, 35). Therefore,  
415 we believe that regulation of the CAC3319 and CAC0323 genes by sr8384 constitutes  
416 an important part of the entire regulatory network of this sncRNA.

417 It should be noted that, in addition to the above-identified targets, sr8384 might  
418 regulate other genes. Here, although the comparative transcriptomic data for the  
419 sr8384-overexpressing strain in combination with the application of the online tool  
420 IntaRNA has proven useful for the prediction of sncRNA targets in *C. acetobutylicum*,  
421 it cannot be ruled out that some additional targets may have been missed. For example,  
422 the expression of some targets might change only when sr8384 is absent, rather than  
423 overexpressed, or some targets might not be expressed in the presence of D-glucose  
424 due to the CCR (carbon catabolite repression) effect. Therefore, for a comprehensive  
425 understanding of the global regulatory function of sr8384, microarray analyses based  
426 on sr8384 deletion or using other major carbon sources are necessary.

427 In summary, our data here identify sr8384 as a pleiotropic regulator in *C.*  
428 *acetobutylicum*. Multiple direct and indirect targets that are associated with different

429 essential biological processes in *C. acetobutylicum* are controlled by this sncRNA,  
430 revealing a preliminary regulatory network (Figure 9). This pleiotropic function  
431 enables sr8384 to play a determinant role in *C. acetobutylicum*. Notably, improved  
432 cellular performance was achieved via modulation of the expression of sr8384 or its  
433 target genes. With these characteristics, sr8384, to the best of our knowledge, is the  
434 first identified sncRNA involved in regulating various physiological and metabolic  
435 processes in the industrially important *Clostridium* species. In addition, given the  
436 discovery of a functional sr8384 homolog in *C. beijerinckii*, another important  
437 industrial *Clostridium* species, this type of functional sncRNA may be widespread in  
438 clostridia, including pathogenic *Clostridium* species. In summary, this work provides  
439 new insight into the role of sncRNAs in clostridia and offers new opportunities for  
440 engineering these anaerobes.

441

442

443

444

445

446

447

448

449

450

## 451 MATERIAL AND METHODS

### 452 Media and cultivation conditions

453 Luria-Bertani (LB) medium, supplemented with ampicillin (100 µg/mL) and  
454 spectinomycin (50 µg/mL) when needed, was used to cultivate *E. coli*. *C.*  
455 *acetobutylicum* was first grown anaerobically (Thermo Forma Inc., Waltham, MA) in  
456 CGM medium (36) for inoculum preparation. Upon reaching the exponential growth  
457 phase ( $OD_{600}=0.8-1.0$ ), the cells (5% inoculation amount) were transferred into P2  
458 medium (37) for fermentation. Erythromycin (10 µg/mL) and thiamphenicol (8  
459 µg/mL) were added to the P2 medium when needed. Samples for assays were  
460 removed at different time points and then stored at -20°C.

461

### 462 Bacterial strains and plasmid construction

463 The primers used in this study are listed in Table S4. The strains and plasmids used  
464 in this work are listed in Table S5. Top10 cells were used for gene cloning. The  
465 plasmids were first methylated by *E. coli* ER2275 and then electroporated into *C.*  
466 *acetobutylicum*.

467 The CAC2384 gene was disrupted using the group II intron-based Targetron system.  
468 In brief, a 350-bp DNA fragment was amplified by PCR with the following primers:  
469 the EBS universal primer, CAC2384-174,175s-IBS, CAC2384-174,175s-EBS1d and  
470 CAC2384-174,175s-EBS2. Amplification was performed according to the protocol of  
471 the Targetron Gene Knockout System Kit (Sigma-Aldrich, St Louis, MO, USA). After  
472 digestion with *Xho*I and *Bsr*GI, this 350-bp DNA fragment was cloned into the

473 plasmid pWJ1 (38), yielding the plasmid pWJ1-CAC2384.

474 The pP<sub>thl</sub> plasmid was constructed as previously reported (39). The P<sub>2384</sub> fragment  
475 was amplified by PCR using the primers P<sub>2384</sub>-for and P<sub>2384</sub>-rev with the genomic  
476 DNA of *C. acetobutylicum* as the template. After digestion with *Pst*I and *Bam*HI, the  
477 P<sub>2384</sub> fragment was cloned into the plasmid pP<sub>thl</sub>, yielding the plasmid pP<sub>2384</sub>. Similarly,  
478 the CAC2384 fragment was amplified by PCR using the primers CAC2384-for and  
479 CAC2384-rev. Then, the CAC2384 fragment was digested with *Sal*I and *Bam*HI and  
480 ligated to the plasmids pP<sub>thl</sub> and pP<sub>2384</sub>, yielding the plasmids pP<sub>thl</sub>-2384 and  
481 pP<sub>2384</sub>-2384, respectively. The plasmid pIMP1-f62 was derived from pP<sub>thl</sub> by replacing  
482 the promoter P<sub>thl</sub> with P<sub>2384-140</sub>. The pIMP1-f62-LT and pIMP1-f62-RT plasmids were  
483 derived from pIMP1-f62 by adding the terminator at the left side or right side of  
484 P<sub>2384-140</sub>, respectively. The plasmid pIMP1-P<sub>ptb</sub>-CAC2385 was generated from  
485 pIMP1-P<sub>ptb</sub> (40) by adding the CAC2385 gene under the control of the promoter P<sub>ptb</sub>.

486 For overexpression of sr8384 and sr8889 in *C. acetobutylicum* and *C. beijerinckii*,  
487 respectively, the sr8384 and sr8889 sequences were amplified by PCR, digested with  
488 *Sal*I and *Bam*HI, and then ligated with the plasmid pP<sub>thl</sub> that had been digested with  
489 the same restriction enzymes, yielding the plasmids pIMP1-P<sub>thl</sub>-sr8384 and  
490 pIMP1-P<sub>thl</sub>-sr8889, respectively.

491 The plasmid used for small regulatory RNA-based knockdown of sr8384 was  
492 constructed according to a previously reported method (18, 19). In brief, the fragment  
493 P<sub>thl</sub>-AS-sr8384-MicC, which contained a 24-nt target-binding sequence  
494 complementary to sr8384 and the MicC sRNA scaffold, was first amplified by PCR



495 using the plasmid pP<sub>thl</sub> as the template with the primers AS-P<sub>thl</sub>-s and  
496 AS-sr8384-MicC-a. Then, a fragment containing both the promoter P<sub>ptb</sub> and Hfq<sup>EC</sup>  
497 (P<sub>ptb</sub>-Hfq<sup>EC</sup>) was obtained by overlap PCR. Finally, the fragments  
498 P<sub>thl</sub>-AS-sr8384-MicC and P<sub>ptb</sub>-Hfq<sup>EC</sup> were assembled by overlap PCR, yielding the  
499 large fragment P<sub>thl</sub>-AS-sr8384-MicC-P<sub>ptb</sub>-Hfq<sup>EC</sup>. After digestion with *Pst*I and *Eco*RI,  
500 the fragment P<sub>thl</sub>-AS-sr8384-MicC-P<sub>ptb</sub>-Hfq<sup>EC</sup> was ligated with the plasmid pP<sub>thl</sub> that  
501 had been digested with the same restriction enzymes, yielding the plasmid  
502 pIMP1-AS-sr8384. The method for the construction of the plasmids used for  
503 knockdown of the other target genes in this study was the same as that used for sr8384,  
504 changing only the 24-nt target-binding sequence.

505 For overexpression of CAC0365, CAC3157, CAC2470 and CAC3318, these genes  
506 were firstly PCR-amplified with the primers listed in Table S4. After digestion with  
507 *Sal*I and *Bam*HI, these fragments were ligated to pP<sub>thl</sub> to yield the plasmids  
508 pP<sub>thl</sub>-CAC0365, pP<sub>thl</sub>-CAC3157, pP<sub>thl</sub>-CAC2470 and pP<sub>thl</sub>-CAC3318. Next, to study  
509 the synergistic effect of CAC3157, CAC2470 and CAC3318 on growth and solvents  
510 production of *C. acetobutylicum*, CAC3318 and CAC2470 were PCR-amplified  
511 separately with the primers listed in Table S4. Then, CAC3318-CAC2470 was  
512 acquired by overlap PCR with CAC3318 and CAC2470 supplied as templates. After  
513 digestion with *Bam*HI and *Eco*RI, CAC3318-CAC2470 was cloned to the plasmid  
514 pP<sub>thl</sub>-CAC3157, yielding pP<sub>thl</sub>-CAC3157-3318-2470.

515

516 **Gene disruption and functional complementation using a group II intron**

517 **(targetron)**

518 Gene disruption in *C. acetobutylicum* was achieved through chromosomal insertion  
519 of a group II intron by using the targetron plasmid (15). The primers used for  
520 retargeting the RNA portion of the intron to target genes were listed in Table S4. In  
521 detail, the fragments of  $P_{thl}$ ,  $P_{thl}$ -CAC2384,  $P_{2384}$ ,  $P_{2384}$ -CAC2384 and the two separate  
522 part of the initial intron sequence were PCR-amplified by using the primer pairs listed  
523 in Table S4. Then, the whole functional sequence, which contained both the intron and  
524 the insertion sequence, were acquired by overlap PCR with Intron-for/Intron-rev  
525 supplied as primers and inserted into the chromosome by using the “targetron”  
526 strategy.

527

## 528 **Analytical methods**

529 The density of the culture ( $A_{600}$ ) after cell growth was tested using a  
530 spectrophotometer (DU730, Beckman Coulter, Placentia, California, USA). The  
531 concentrations of the solvents (acetone, acetic acid, butyric acid, butanol, and ethanol)  
532 were determined using gas chromatography (7890A, Agilent, Wilmington, DE, USA).  
533 Isobutyl alcohol and isobutyric acid were used as the internal standards for solvent  
534 quantification.

535

## 536 **Identification of transposon insertions in the chromosome by reverse** 537 **transcription PCR**

538 The transposon mutant library of *C. acetobutylicum* that was constructed according

539 to a previously reported protocol (14) was used to identify mutants that exhibited  
540 greatly changed solvent production. The selected mutant strain was used for reverse  
541 transcription PCR analysis to identify the transposon insertion site in the chromosome  
542 as reported previously (14).

543

#### 544 **Two-step RT-PCR analysis**

545 The two-step RT-PCR analysis was performed according to the previous report (41),  
546 in order to determine the transcriptional direction of the potential small RNA sr8384.  
547 In brief, the total RNA of *C. acetobutylicum* was isolated by TRIzol extraction. A pair  
548 of primers that match the sr8384 sequence were separately added into the total RNA  
549 to synthesize the first-strand cDNA by using the PrimeScript RT Reagent Kit (TaKaRa,  
550 cat. #RR047A). Next, two primers were simultaneously used for the second round of  
551 PCR amplification using the above first-strand cDNA as the template. Finally, the  
552 PCR products were separated on 1.5% agarose gels.

553

#### 554 **Southern blot analysis**

555 Southern blot was performed using a digoxigenin (DIG) High Prime DNA Labeling  
556 and Detection Starter Kit I (Roche Diagnostics GmbH, Mannheim, Germany) as  
557 instructed by the manufacturer. Briefly, 10 µg of genomic DNA was digested with  
558 *Hind*III for about 14 h, separated on a 1.0% agarose gel, and then transferred to a  
559 charged nylon membrane. Next, the digoxigenin-labeled DNA probe was used for  
560 southern hybridization.

561

## 562 **Northern blot analysis**

563 In the Northern blot analysis, 50 µg of total RNA was loaded and  
564 electrophoretically resolved on a 7% denaturing polyacrylamide gel containing 7M  
565 urea. Then, the RNA was transferred to an Immobilon-NY+ membrane (Merck KGaA,  
566 Darmstadt, Germany, INYC00010) and immobilized by UV-crosslinking. A 94-nt  
567 digoxigenin-labeled probe (20 pmol) complementary to the sRNA sequence was  
568 synthesized and used to detect the presence of the sRNA. The prehybridization (1-2 h)  
569 and hybridization (16 h) steps were performed at 37°C using NorthernMax<sup>®</sup>  
570 prehybridization and hybridization buffers (LifeTech, Thermo Fisher Scientific Inc.,  
571 Carlsbad, CA, USA; cat: AM8677). The membrane was washed twice with 4×SSC  
572 buffer for 15 min and then washed with 2×SSC buffer (2×SSC, 0.1% SDS) for an  
573 additional 15 min. Finally, immunological detection was performed according to the  
574 protocol for the DIG Northern Starter Kit (Roche, Mannheim, Germany, Cat. No.  
575 12039672910).

576

## 577 **5' and 3' rapid amplification of cDNA ends (RACE) analysis**

578 The 5' and 3' RACE analyses were performed according to the protocol for the  
579 SMARTer<sup>®</sup> RACE 5'/3' Kit (TaKaRa Bio USA, Inc., cat. nos. 634858, 634859). The  
580 whole upstream noncoding region (202 nt) of the CAC2384 gene, together with the  
581 ORF of CAC2383 and CAC2384, was PCR-amplified from the chromosome of *C.*  
582 *acetobutylicum* and then integrated into a multicopy plasmid to enrich the transcripts

583 for RACE. For the 3' RACE analysis, a poly(A) tail was first added to the 3' end of the  
584 RNA template using *E. coli* poly(A) polymerase (New England BioLabs, Beverly,  
585 MA, USA; M0276S).

586

### 587 **Microarray analysis**

588 CAC-smR and the control strain were grown in P2 medium (500 ml) with  
589 erythromycin supplementation (10 µg/mL). D-glucose (80 g/L) was used as the sole  
590 carbon source. Samples for microarray analysis were taken at 23 h (acidogenic phase)  
591 and 42 h (acid-solvent transition phase). After centrifugation at 4°C for 10 min, the  
592 cell pellets were frozen immediately in liquid nitrogen. Then, the cells were ground  
593 into a powder and dissolved in TRIzol reagent (Invitrogen, Carlsbad, CA). Microarray  
594 analysis was performed using Agilent custom 60-mer oligonucleotide microarrays  
595 (Shanghai Biochip Co. Ltd., Shanghai, China) as described previously (42, 43). Genes  
596 that exhibited greater than 2-fold changes in expression in CAC-smR compared to the  
597 expression in the control strain were considered to be differentially expressed.

598

### 599 **Quantitative real-time RT-PCR**

600 For qRT-PCR analyses, RNA was isolated by TRIzol extraction as described  
601 previously (42). RNA was reverse transcribed to cDNA using the PrimeScript RT  
602 Reagent Kit (TaKaRa, cat. #RR047A). Then, qRT-PCR was carried out in a MyiQ2  
603 two-color real-time PCR detection system (Bio-Rad) with the following conditions:  
604 95°C for 2 min, followed by 40 cycles of 95°C for 15 s, 55°C for 20 s, and 72°C for

605 20 s. The CAC2679 (42) gene (encoding pullulanase) was used as an internal control.

606 The primers used for qRT-PCR analysis are listed in Table S4.

607

### 608 **Secondary structure analysis and target prediction of sRNA in *C. acetobutylicum***

609 The secondary structure of sr8384 was generated using PseudoViewer (44).

610 IntaRNA online software (20) was used to screen for the putative sRNA targets across

611 the genome of *C. acetobutylicum* (Target NCBI RefSeq IDs: NC\_003030 and

612 NC\_001988), in which the 94-nt whole sequence of sr8384 was entered as the query

613 ncRNA.

614

### 615 **In vitro transcription**

616 RNAs were synthesized *in vitro* from PCR-generated DNA fragments using the

617 MEGAscript<sup>TM</sup> T7 High Yield Transcription Kit (Thermo Fisher Scientific Baltics

618 UAB, Vilnius, Lithuania; AM1334) and then purified using the MEGAclean<sup>TM</sup> Kit

619 (Thermo Fisher Scientific Baltics UAB, Vilnius, Lithuania; AM1908). The primers

620 used for *in vitro* transcription are listed in Table S4.

621

### 622 **Analysis of RNA-RNA complex formation**

623 RNA-RNA complex formation analysis was performed as previously reported (29).

624 In brief, the 62-nt sr8384 was synthesized and then labeled with Cy5 at the 5' end. In

625 the RNA hybridization experiment, the Cy5-labeled sr8384 and target RNA were first

626 resolved in TMN buffer (20 mM Tris-acetate (pH 7.5), 2 mM MgCl<sub>2</sub>, 100 mM NaCl)

627 and then incubated at 95°C for 2 min. Next, for proper RNA folding, both the  
628 Cy5-labeled sr8384 and target RNA were incubated on ice for 2 min followed by 30  
629 min at 37°C. The Cy5-labeled sr8384 was incubated with various concentrations of  
630 target RNA in TMN buffer (containing 0.1 µg/µL tRNA) (Sigma-Aldrich Trading,  
631 Shanghai, China; R8508) at 37°C for 15 min. The RNA-RNA complex formation  
632 reaction was stopped by adding stop solution (1×TMN, 50% glycerol, 0.5%  
633 bromophenol blue and xylene cyanol). Finally, the mixture was loaded onto a 6%  
634 native polyacrylamide gel and resolved by electrophoresis (120 V, 4°C, 1 h). The gel  
635 was scanned using an FLA-9000 phosphorimager (FujiFilm, Japan) for visualization.

636

637

638

639

640

641

642

643

644

645

646

647

648

649 **FUNDING**

650 This work was supported by the National Natural Science Foundation of China  
651 (31630003 and 31670043), the Youth Innovation Promotion Association of the  
652 Chinese Academy of Sciences (membership 2012213), and Postdoctoral Science  
653 Foundation of China (2017M610282 and 2018T110410).

654

655

656

657

658

659

660

661

662

663

664

665

666

667

668

669

670



671 **REFERENCES**

- 672 1. **Durre P.** 2008. Fermentative butanol production: bulk chemical and biofuel. *Ann N Y*  
673 *Acad Sci* **1125**:353-362.
- 674 2. **Jones DT, Woods DR.** 1986. Acetone-butanol fermentation revisited. *Microbiol Rev*  
675 **50**:484-524.
- 676 3. **Tracy BP, Jones SW, Fast AG, Indurthi DC, Papoutsakis ET.** 2012. Clostridia: the  
677 importance of their exceptional substrate and metabolite diversity for biofuel and  
678 biorefinery applications. *Curr Opin Biotechnol* **23**:364-381.
- 679 4. **Yang Y, Nie X, Jiang Y, Yang C, Gu Y, Jiang W.** 2018. Metabolic regulation in  
680 solventogenic clostridia: regulators, mechanisms and engineering. *Biotechnol Adv*  
681 **36**:905-914.
- 682 5. **Brantl S, Bruckner R.** 2014. Small regulatory RNAs from low-GC Gram-positive  
683 bacteria. *RNA Biol* **11**:443-456.
- 684 6. **Gottesman S, Storz G.** 2011. Bacterial Small RNA Regulators: Versatile Roles and  
685 Rapidly Evolving Variations. *Cold Spring Harb Perspect Biol* **3**: pii: a003798.
- 686 7. **Gaida SM, Al-Hinai MA, Indurthi DC, Nicolaou SA, Papoutsakis ET.** 2013.  
687 Synthetic tolerance: three noncoding small RNAs, DsrA, ArcZ and RprA, acting  
688 supra-additively against acid stress. *Nucleic Acids Res* **41**:8726-8737.
- 689 8. **Gopel Y, Gorke B.** 2012. Rewiring two-component signal transduction with small  
690 RNAs. *Curr Opin Microbiol* **15**:132-139.
- 691 9. **Kang Z, Zhang C, Zhang J, Jin P, Zhang J, Du G, Chen J.** 2014. Small RNA  
692 regulators in bacteria: powerful tools for metabolic engineering and synthetic biology.

- 693 Appl Microbiol Biotechnol **98**:3413-3424.
- 694 10. **Borden JR, Jones SW, Indurthi D, Chen YL, Papoutsakis ET.** 2010. A  
695 genomic-library based discovery of a novel, possibly synthetic, acid-tolerance  
696 mechanism in *Clostridium acetobutylicum* involving non-coding RNAs and  
697 ribosomal RNA processing. Metab Eng **12**:268-281.
- 698 11. **Jones AJ, Venkataramanan KP, Papoutsakis T.** 2016. Overexpression of two  
699 stress-responsive, small, non-coding RNAs, 6S and tmRNA, imparts butanol  
700 tolerance in *Clostridium acetobutylicum*. FEMS Microbiol Lett **363**: pii: fnw063.
- 701 12. **Jones AJ, Fast AG, Clupper M, Papoutsakis ET.** 2018. Small, low, but potent: the  
702 complex regulatory role of the small RNA SolB on solventogenesis in *Clostridium*  
703 *acetobutylicum*. Appl Environ Microbiol **84**: pii: e00597-18.
- 704 13. **Chen YL, Indurthi DC, Jones SW, Papoutsakis ET.** 2011. Small RNAs in the  
705 Genus *Clostridium*. mBio **2**: e00340-10..
- 706 14. **Zhang Y, Xu S, Chai C, Yang S, Jiang W, Minton NP, Gu Y.** 2016. Development of  
707 an inducible transposon system for efficient random mutagenesis in *Clostridium*  
708 *acetobutylicum*. FEMS Microbiol Lett **363**: pii: fnw065.
- 709 15. **Shao L, Hu S, Yang Y, Gu Y, Chen J, Yang Y, Jiang W, Yang S.** 2007. Targeted  
710 gene disruption by use of a group II intron (targetron) vector in *Clostridium*  
711 *acetobutylicum*. Cell Res **17**:963-965.
- 712 16. **Jia K, Zhu Y, Zhang Y, Li Y.** 2011. Group II intron-anchored gene deletion in  
713 *Clostridium*. PLoS One **6**:e16693.
- 714 17. **Kuehne SA, Heap JT, Cooksley CM, Cartman ST, Minton NP.** 2011.

- 715           ClosTron-mediated engineering of *Clostridium*. *Methods Mol Biol* **765**:389-407.
- 716   18.   **Cho C, Lee SY.** 2017. Efficient gene knockdown in *Clostridium acetobutylicum* by  
717           synthetic small regulatory RNAs. *Biotechnol Bioeng* **114**:374-383.
- 718   19.   **Yoo SM, Na D, Lee SY.** 2013. Design and use of synthetic regulatory small RNAs to  
719           control gene expression in *Escherichia coli*. *Nat Protoc* **8**:1694-1707.
- 720   20.   **Busch A, Richter AS, Backofen R.** 2008. IntaRNA: efficient prediction of bacterial  
721           sRNA targets incorporating target site accessibility and seed regions. *Bioinformatics*  
722           **24**:2849-2856.
- 723   21.   **Kawasaki S, Watamura Y, Ono M, Watanabe T, Takeda K, Niimura Y.** 2005.  
724           Adaptive responses to oxygen stress in obligatory anaerobes *Clostridium*  
725           *acetobutylicum* and *Clostridium aminovalericum*. *Appl Environ Microbiol*  
726           **71**:8442-8450.
- 727   22.   **Grant GA.** 2012. Contrasting catalytic and allosteric mechanisms for  
728           phosphoglycerate dehydrogenases. *Arch Biochem Biophys* **519**:175-185.
- 729   23.   **Letunic I, Bork P.** 2018. 20 years of the SMART protein domain annotation resource.  
730           *Nucleic Acids Res* **46**:D493-D496.
- 731   24.   **Yang GH, Jia DC, Jin L, Jiang YQ, Wang Y, Jiang WH, Gu Y.** 2017. Rapid  
732           Generation of Universal Synthetic Promoters for Controlled Gene Expression in Both  
733           Gas-Fermenting and Saccharolytic *Clostridium* Species. *ACS Synth Biol*  
734           **6**:1672-1678.
- 735   25.   **Wassarman KM, Repoila F, Rosenow C, Storz G, Gottesman S.** 2001.  
736           Identification of novel small RNAs using comparative genomics and microarrays.

- 737 Genes Dev **15**:1637-1651.
- 738 26. **Hershberg R, Altuvia S, Margalit H.** 2003. A survey of small RNA-encoding genes  
739 in *Escherichia coli*. Nucleic Acids Res **31**:1813-1820.
- 740 27. **Parker S, Fraczek MG, Wu J, Shamsah S, Manousaki A, Dungrattanalert K, de**  
741 **Almeida RA, Estrada-Rivadeneira D, Omara W, Delneri D, O'Keefe RT.** 2017. A  
742 resource for functional profiling of noncoding RNA in the yeast *Saccharomyces*  
743 *cerevisiae*. RNA **23**:1166-1171.
- 744 28. **Wu J, Delneri D, O'Keefe RT.** 2012. Non-coding RNAs in *Saccharomyces*  
745 *cerevisiae*: what is the function? Biochem Soc Trans **40**:907-911.
- 746 29. **Heidrich N, Chinali A, Gerth U, Brantl S.** 2006. The small untranslated RNA SR1  
747 from the *Bacillus subtilis* genome is involved in the regulation of arginine catabolism.  
748 Mol Microbiol **62**:520-536.
- 749 30. **Tan Y, Liu ZY, Liu Z, Zheng HJ, Li FL.** 2015. Comparative transcriptome analysis  
750 between *csrA*-disruption *Clostridium acetobutylicum* and its parent strain. Mol  
751 Biosyst **11**:1434-1442.
- 752 31. **Venkataramanan KP, Jones SW, McCormick KP, Kunjeti SG, Ralston MT,**  
753 **Meyers BC, Papoutsakis ET.** 2013. The *Clostridium* small RNome that responds to  
754 stress: the paradigm and importance of toxic metabolite stress in *C. acetobutylicum*.  
755 BMC Genomics **14**:849.
- 756 32. **Brigelius-Flohe R, Flohe L.** 2003. Is there a role of glutathione peroxidases in  
757 signaling and differentiation? (Reprinted from Thiol Metabolism and Redox  
758 Regulation of Cellular Functions). Biofactors **17**:93-102.

- 759 33. **Nolling J, Breton G, Omelchenko MV, Makarova KS, Zeng Q, Gibson R, Lee**  
760 **HM, Dubois J, Qiu D, Hitti J, Wolf YI, Tatusov RL, Sabathe F, Doucette-Stamm**  
761 **L, Soucaille P, Daly MJ, Bennett GN, Koonin EV, Smith DR.** 2001. Genome  
762 sequence and comparative analysis of the solvent-producing bacterium *Clostridium*  
763 *acetobutylicum*. J Bacteriol **183**:4823-4838.
- 764 34. **Alsaker KV, Spitzer TR, Papoutsakis ET.** 2004. Transcriptional analysis of *spo0A*  
765 overexpression in *Clostridium acetobutylicum* and its effect on the cell's response to  
766 butanol stress. J Bacteriol **186**:1959-1971.
- 767 35. **Harris LM, Welker NE, Papoutsakis ET.** 2002. Northern, morphological, and  
768 fermentation analysis of *spo0A* inactivation and overexpression in *Clostridium*  
769 *acetobutylicum* ATCC 824. J Bacteriol **184**:3586-3597.
- 770 36. **Wiesenborn DP, Rudolph FB, Papoutsakis ET.** 1988. Thiolase from *Clostridium*  
771 *acetobutylicum* ATCC 824 and Its Role in the Synthesis of Acids and Solvents. Appl  
772 Environ Microbiol **54**:2717-2722.
- 773 37. **Baer SH, Blaschek HP, Smith TL.** 1987. Effect of Butanol Challenge and  
774 Temperature on Lipid-Composition and Membrane Fluidity of Butanol-Tolerant  
775 *Clostridium acetobutylicum*. Appl Environ Microbiol **53**:2854-2861.
- 776 38. **Sun Z, Chen YX, Yang C, Yang S, Gu Y, Jiang WH.** 2015. A novel  
777 three-component system-based regulatory model for D-xylose sensing and transport  
778 in *Clostridium beijerinckii*. Mol Microbiol **95**:576-589.
- 779 39. **Xiao H, Gu Y, Ning Y, Yang Y, Mitchell WJ, Jiang W, Yang S.** 2011. Confirmation  
780 and elimination of xylose metabolism bottlenecks in glucose

- 781 phosphoenolpyruvate-dependent phosphotransferase system-deficient *Clostridium*  
782 *acetobutylicum* for simultaneous utilization of glucose, xylose, and arabinose. Appl  
783 Environ Microbiol **77**:7886-7895.
- 784 40. **Xue Q, Yang Y, Chen J, Chen L, Yang S, Jiang W, Gu Y.** 2016. Roles of three  
785 AbrBs in regulating two-phase *Clostridium acetobutylicum* fermentation. Appl  
786 Microbiol Biotechnol **100**:9081-9089.
- 787 41. **Pei G, Sun T, Chen S, Chen L, Zhang W.** 2017. Systematic and functional  
788 identification of small non-coding RNAs associated with exogenous biofuel stress in  
789 cyanobacterium *Synechocystis* sp. PCC 6803. Biotechnol Biofuels **10**:57.
- 790 42. **Ren C, Gu Y, Wu Y, Zhang WW, Yang C, Yang S, Jiang WH.** 2012. Pleiotropic  
791 functions of catabolite control protein CcpA in Butanol-producing *Clostridium*  
792 *acetobutylicum*. BMC Genomics **13**:349.
- 793 43. **Yang Y, Zhang L, Huang H, Yang C, Yang S, Gu Y, Jiang W.** 2017. A Flexible  
794 Binding Site Architecture Provides New Insights into CcpA Global Regulation in  
795 Gram-Positive Bacteria. mBio **8**: pii: e02004-16.
- 796 44. **Byun Y, Han K.** 2009. PseudoViewer3: generating planar drawings of large-scale  
797 RNA structures with pseudoknots. Bioinformatics **25**:1435-1437.
- 798  
799  
800  
801  
802

803 **FIGURES**

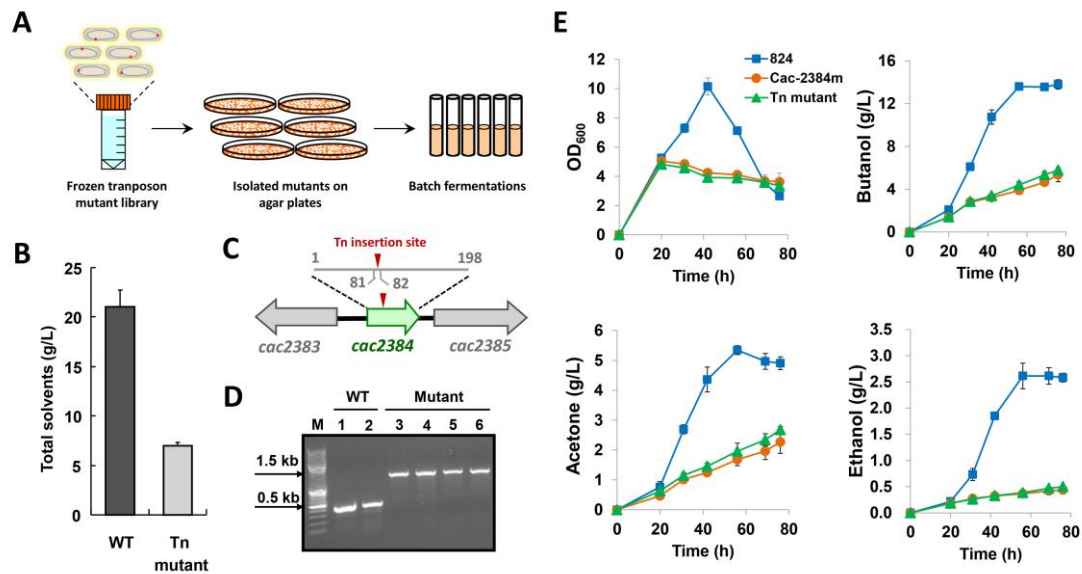

804

805 **FIG 1** Identification and characterization of a *C. acetobutylicum* mutant with

806 significant changes in growth and solvents production. (A) Isolation of transposon

807 mutant with obviously altered ability in forming ABE solvents. (B) Comparison of

808 solvents production of Tn mutant and wild-type strain. (C) Transposon insertion site

809 (the inverted red triangle) on the chromosome of Tn mutant. It is between the +81 and

810 +82 site of open reading frame. (D) Verification of the intron insertion in the

811 *CAC2384* gene by PCR analysis. The 1.5- and 0.5-kb band represents the

812 PCR-amplified fragment containing the intron-inserted and original *CAC2384* gene,

813 respectively. (E) Growth and solvents formation of the Cac-2384m and wild-type

814 strain. Data are means ± standard deviations calculated from triplicate independent

815 experiments.

816

817

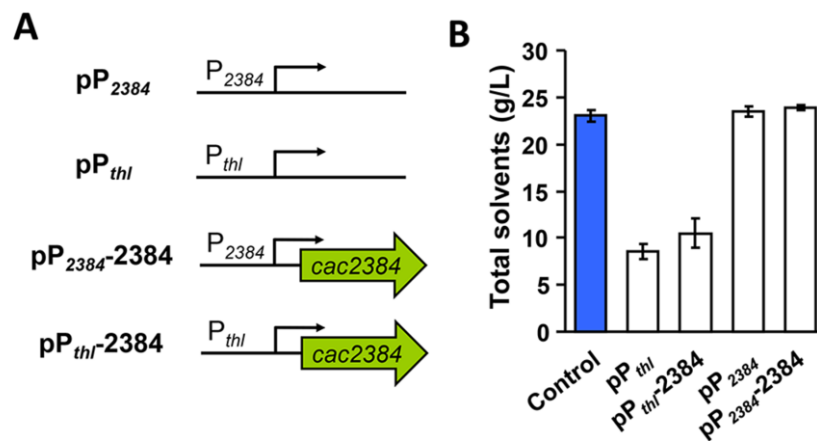

818

819 **FIG 2** Genetic complementation of the Cac-2384m mutant indicates an unknown  
820 crucial molecule related to the phenotypic changes. (A) The four plasmids (pP<sub>thl</sub>,  
821 pP<sub>thl</sub>-2384, pP<sub>2384</sub>, pP<sub>2384</sub>-2384) constructed for genetic complementation of  
822 Cac-2384m. (B) The solvents formation of Cac-2384m mutants with the four  
823 complementary plasmids and the wild-type strain carrying an empty plasmid  
824 (Control). Data are means±standard deviations calculated from triplicate independent  
825 experiments



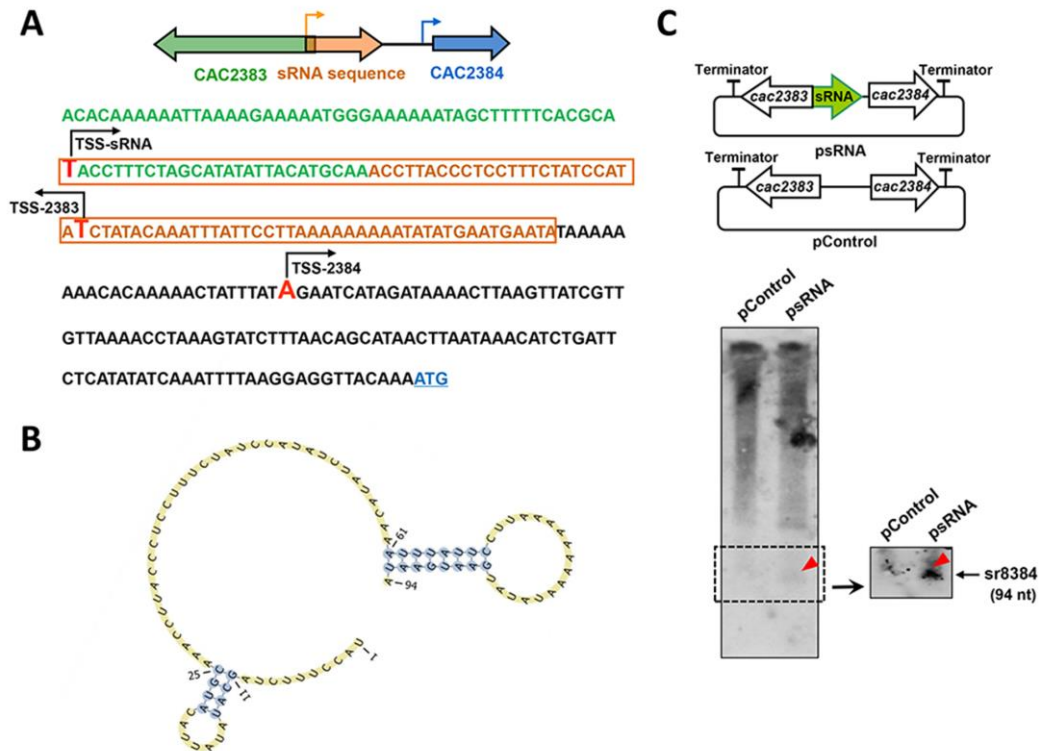

826

827 **FIG 3** Sequence and structure of sr8384. (A) DNA sequence of CAC2383, CAC2384  
 828 and their intergenic region. The sr8384 sequence determined by the RACE reactions  
 829 is shown in orange box. (B) The secondary structure of sr8384. (C) Northern blot  
 830 analysis to identify the predicted sr8384. In this construct, the potential  
 831 sncRNA-coding sequence was expressed by its native promoter; moreover, two  
 832 terminators were located at two ends to avoid the potential expression running  
 833 through from other genes on the plasmid.

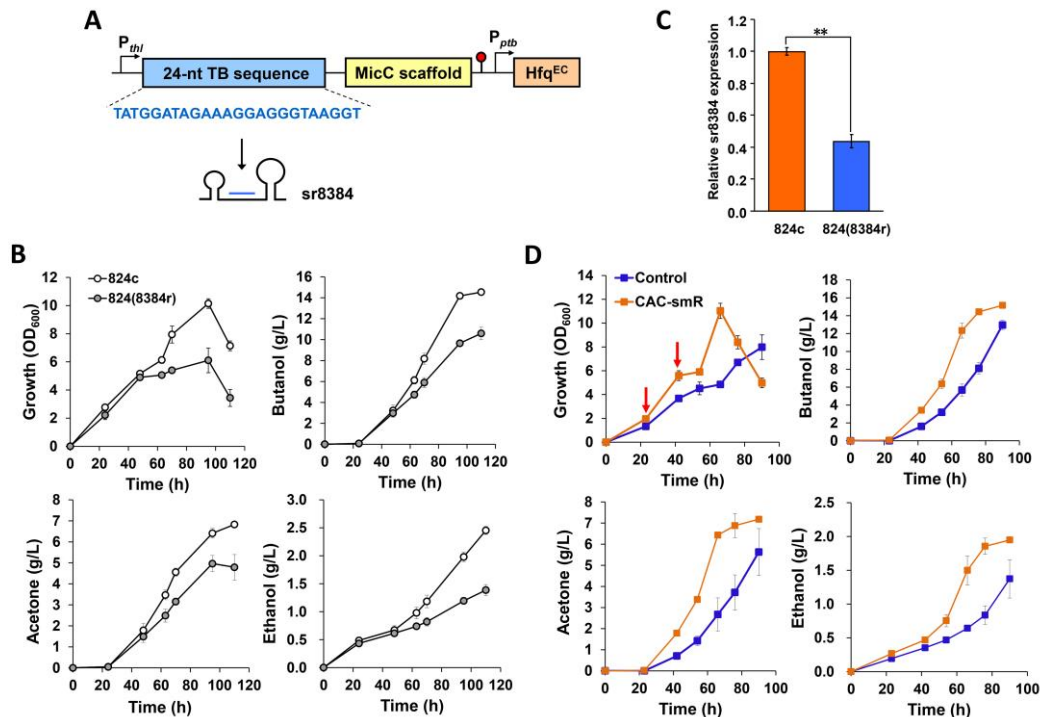

834

835 **FIG 4** The influence of *in vivo* sr8384 level on cellular performance. (A) The  
 836 construct of small regulatory RNA-based gene knockdown. TB: target-binding. The  
 837 24-nt TB sequence is responsible for targeting against sr8384. (B) Phenotypic effects  
 838 of repressed sr8384 expression. 824c, 824c, the wild-type strain that carries the  
 839 pIMP1-AS-con plasmid (without the 24-nt TB sequence); 824(8384r), the strain that  
 840 carries the pIMP1-AS-sr8384 plasmid. Data are means±standard deviations of three  
 841 independent experiments. (C) Fold change of sr8384 level in *C. acetobutylicum* after  
 842 introducing antisense construct. (D) Phenotypic effects derived from increased sr8384  
 843 level. A 500 mL-working volume is used to perform the fermentation. The red arrows  
 844 reflect the sampling time points (23 h and 42 h) for microarray assays. Control, the  
 845 control strain that carries the empty plasmid; CAC-smR, the strain that carries the  
 846 sr8384-overexpression plasmid pIMP1- $P_{thl}$ -sr8384. Data are means±standard  
 847 deviations of two independent experiments.

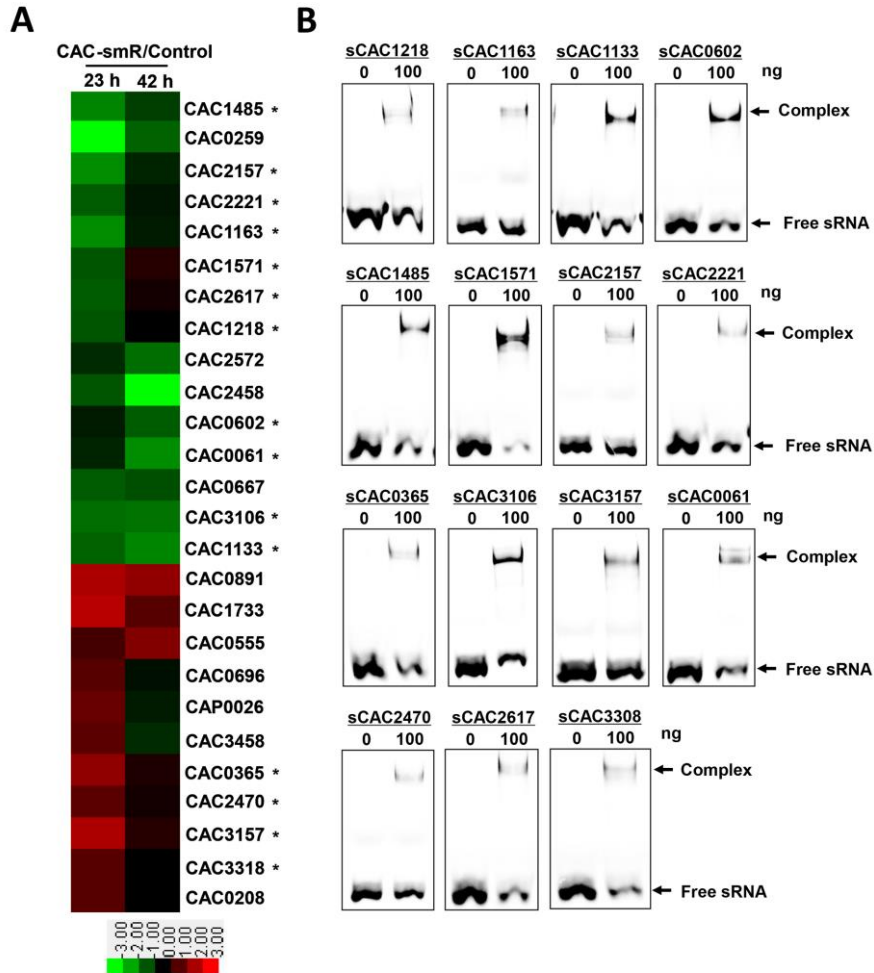

848

849 **FIG 5** Identification of the direct targets of sr8384 in *C. acetobutylicum*. (A) The 26  
850 picked genes that are potentially controlled by sr8384 and simultaneously showed  
851 over 2-fold expressional changes after sr8384 overexpression. (B) 15 identified target  
852 sequences directly bind with sr8384. These 15 genes directly regulated by sr8384  
853 were labelled with asterisk in (A).

854

855

856

857

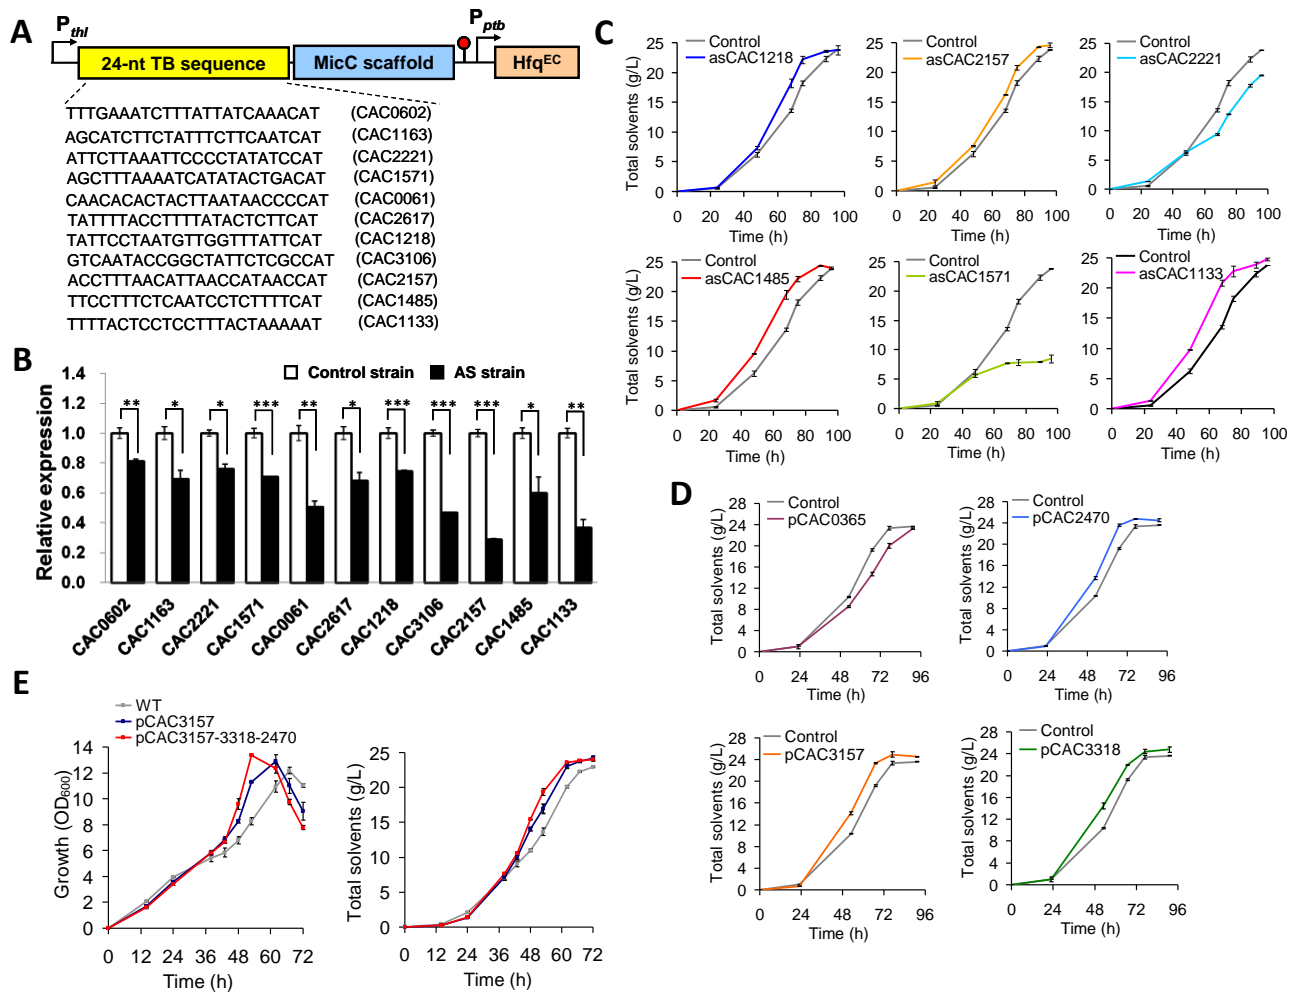

858 **FIG 6** Functional roles of the 15 direct sr8384 targets in *C. acetobutylicum*. (A) The  
 859 constructs for small regulatory RNA-based knockdown of the 11 target genes of  
 860 sr8384. TB: target-binding. The *E. coli* *hfq* gene was expressed under the control of  
 861 *ptb* promoter (B) The 11 sr8384 targets with repressed expressional levels by  
 862 antisense RNA. (C) Altered solvent production derived from expressional repression  
 863 of CAC1218, CAC2157, CAC2221, CAC1485, CAC1571 and CAC1133. (D) Altered  
 864 solvent production derived from the overexpression of CAC2470 (pCAC2470),  
 865 CAC3157 (pCAC3157), CAC3318 (pCAC3318) and CAC0365 (pCAC0365). (E)  
 866 Comparison of the solvents production between single CAC3157 overexpression  
 867 (pCAC3157) and combined overexpression of CAC3157, CAC3318 and CAC2470

868 (pCAC3157-3318-2470). Control, the *C. acetobutylicum* strain harboring a blank  
869 plasmid skeleton. Data are means±standard deviations of three independent  
870 experiments.

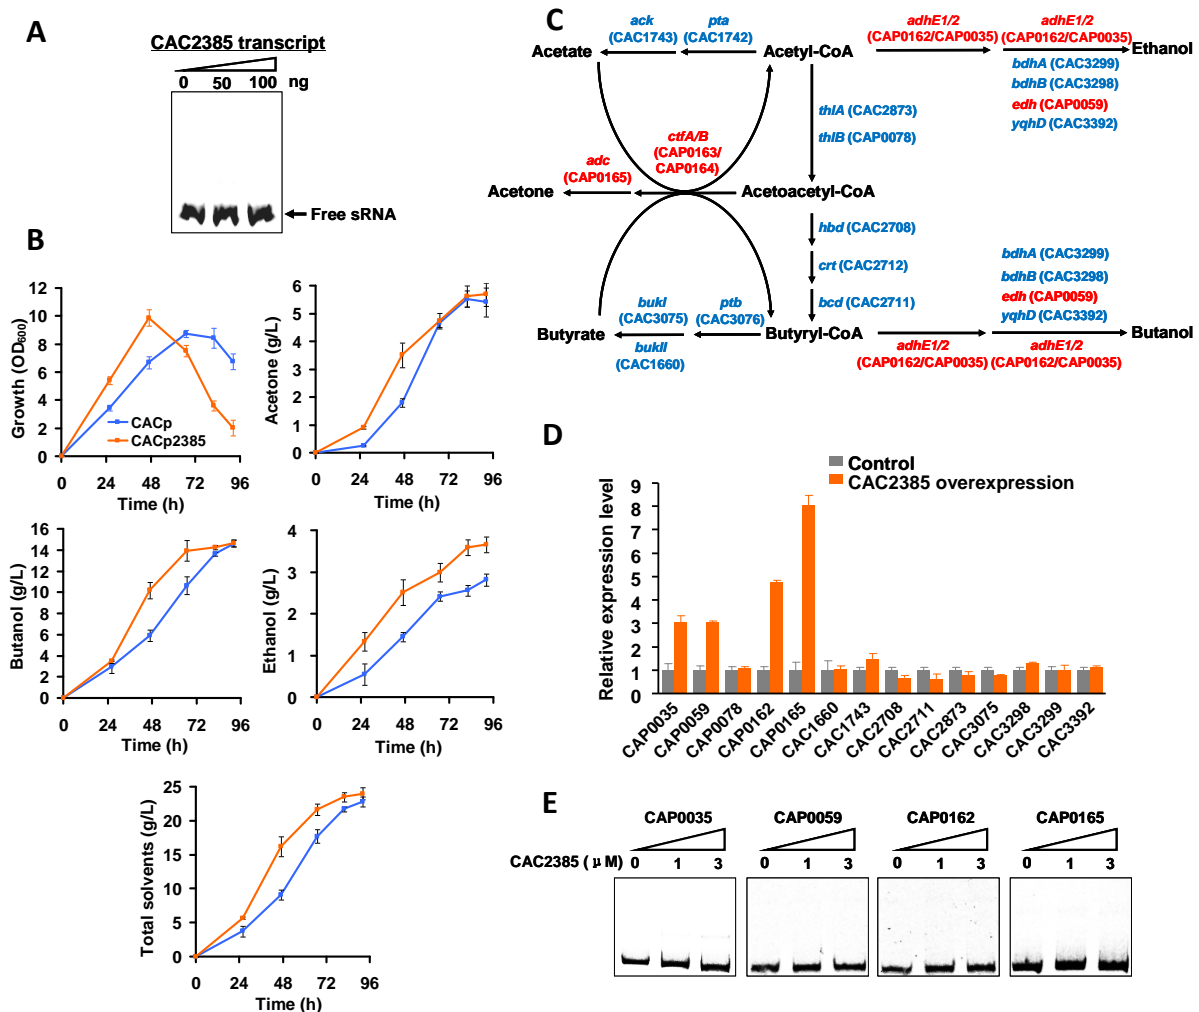

871 **FIG 7** Characterization and functional analysis of the CAC2385 gene. (A) RNA  
 872 hybridization analysis of sr8384 and the CAC2385 transcript (covering the coding and  
 873 the upstream noncoding region of CAC2385). (B) Phenotypic changes derived from  
 874 CAC2385 overexpression. CACp, the strain carries the pIMP1-*P<sub>ptb</sub>* plasmid;  
 875 CACp2385, the strain carries the pIMP1-*P<sub>ptb</sub>*-CAC2385 plasmid. Data are  
 876 means±standard deviations of three independent experiments. (C) All essential genes  
 877 located in solvents synthetic pathways in *C. acetobutylicum*. (D) The expressional  
 878 changes of the genes that located in solvents synthetic pathways after CAC2385  
 879 overexpression. The genes activated by CAC2385 were labelled as red in (C). Here,

880 we used the expressional level of CAP0162 to represent that of the *sol* operon  
881 (cotranscribed CAP0162-0163-0164). Data are means±standard deviations of two  
882 independent experiments. (E) EMSAs of binding of CAC2385-coding protein to the  
883 promoter region of CAP0162, CAP0035, CAP0059 and CAP0165.

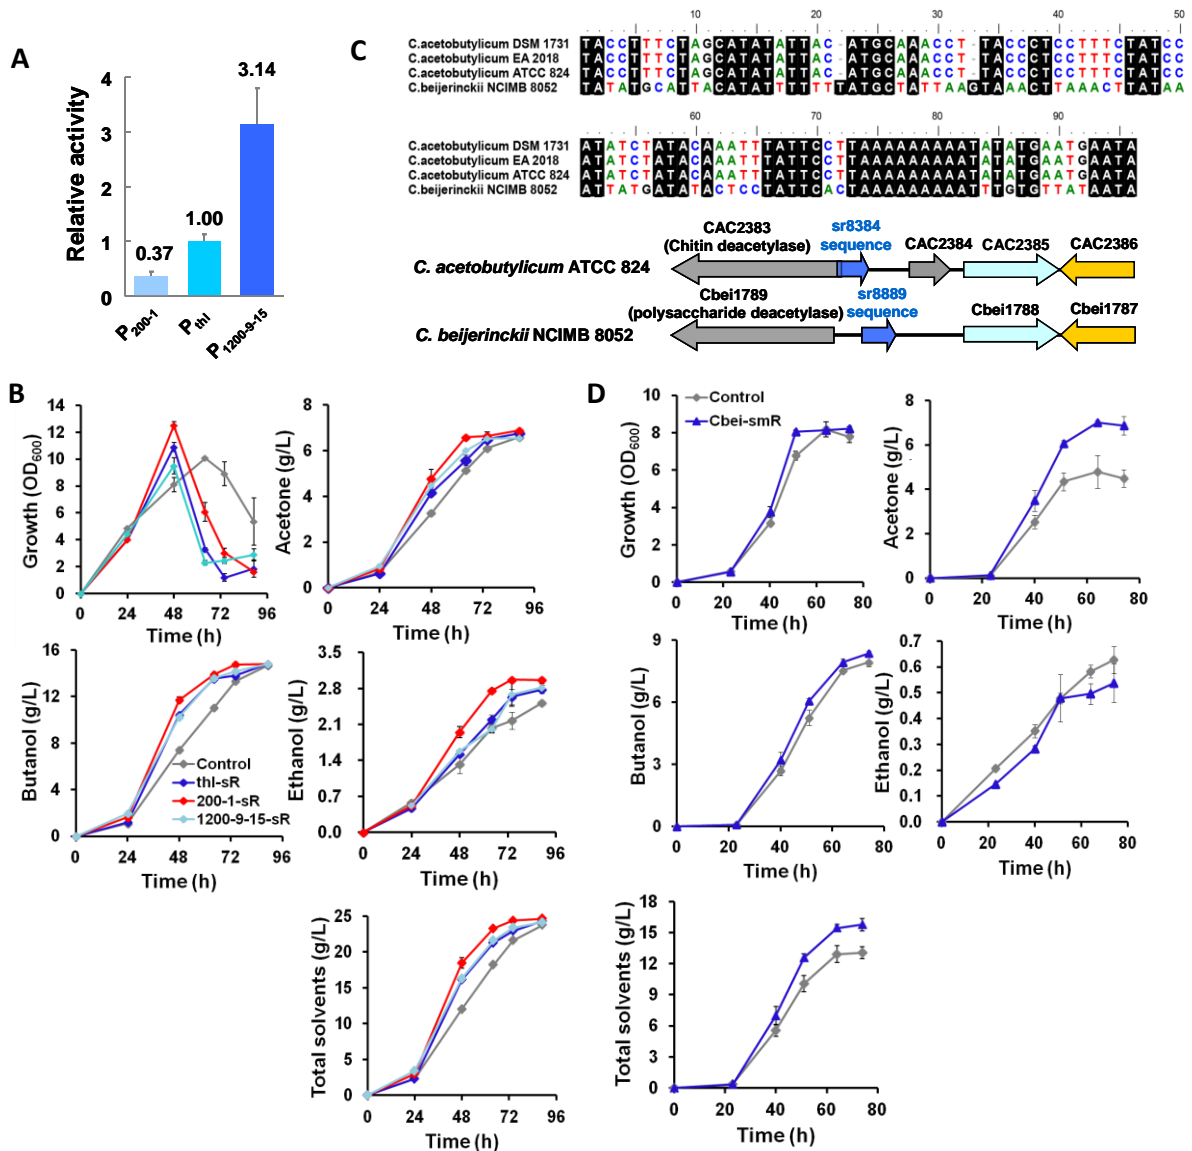

884 **FIG 8** Manipulation of sr8384 and its homolog can improve the growth and solvent  
 885 synthesis of *Clostridium*. (A) Three promoters with gradually increased activities used  
 886 for sr8384 overexpression. (B) Improved growth and total solvents by sr8384  
 887 overexpression using the three promoters in (A). Control, the control strain harbours  
 888 the empty plasmid; thl-sR, the strain with sr8384 overexpressed under the promoter of  
 889  $P_{thl}$ ; 200-1-sR, the strain with sr8384 overexpressed under the promoter of  $P_{200-1}$ ;  
 890 1200-9-15-sR, the strain with sr8384 overexpressed under the promoter of  $P_{1200-9-15}$ .  
 891 (C) The coding sequence of sr8384 homologs in clostridia. (D) Improved cellular



892 performance of *C. beijerinckii* by sr8889 overexpression (the sr8384 homolog in *C.*  
893 *beijerinckii*). Data are means±standard deviations of three independent experiments.

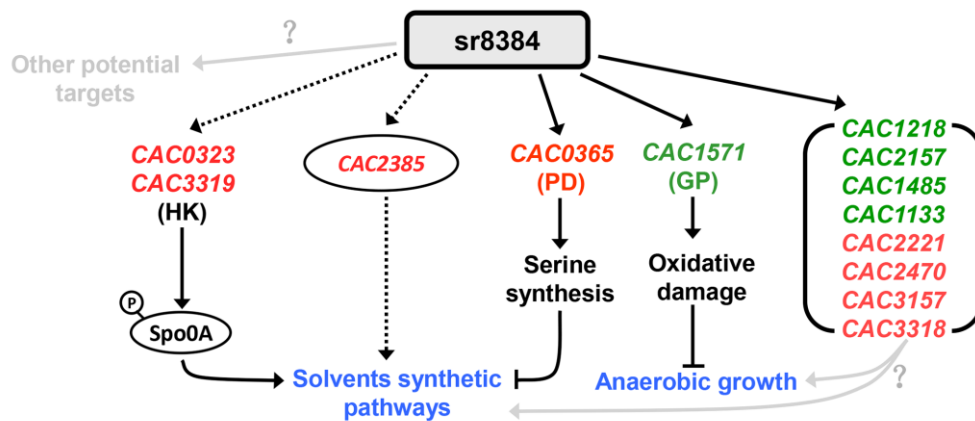

894

895 **FIG 9** Schema illustrating the pleiotropic regulation of sr8384 in *C. acetobutylicum*.

896 The dotted and solid arrow mean indirect and direct regulation, respectively. Spo0A:

897 the global regulator that is involved in controlling spore formation and many other

898 physiological and metabolic processes in clostridia. Both CAC0323 and CAC3319

899 encode histidine kinase responsible for Spo0A phosphorylation. PD: phosphoglycerate

900 dehydrogenase. GP: glutathione peroxidase. The genes shown in red and green

901 represent expressional activation and repression by sr8384, respectively. The

902 questions remained to be explored were marked with interrogation points.

903
